# Supplementary material for: Identification of Forensically Important Calliphoridae and Sarcophagidae Species Collected in Korea Using SNaPshot Multiplex System Targeting the Cytochrome c Oxidase Subunit I Gene
Source: Hindawi journal article supplement (doi:10.1155/2018/2953892), 2018-01-01
Supplement: f1 [file 2953892.f1.pdf]

*Lucilia ampullaceae* (Villeneuve, 1922)

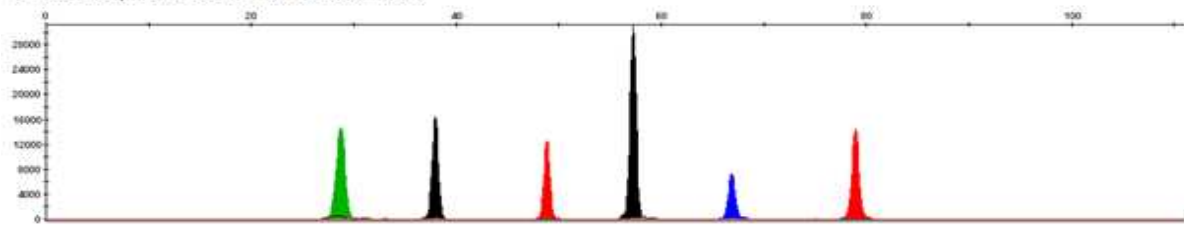

*Lucilia caesar* (Linnaeus, 1758)

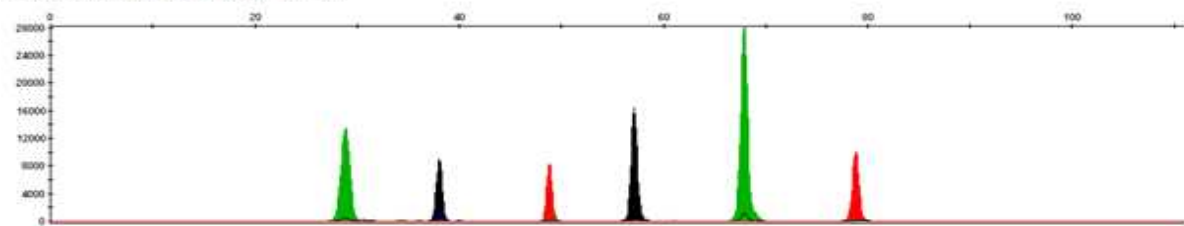

*Lucilia illustris* (Meigen, 1826)

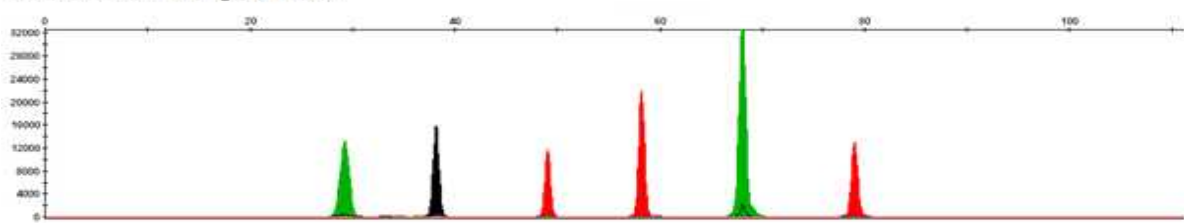

*Chrysomya megacephala* (Fabricius, 1794)

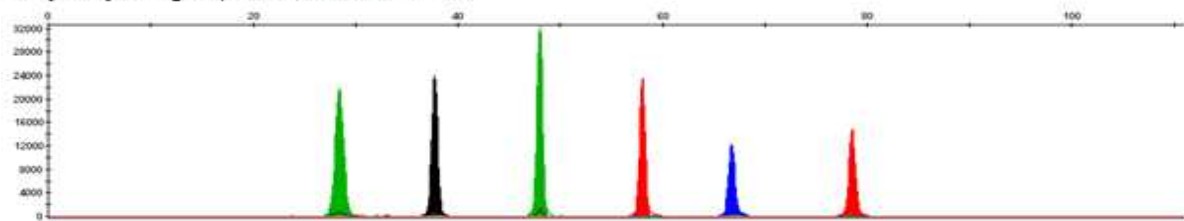

**Supplementary Figure 1-1.** Multiplex system results for Calliphoridae species: using Calliphoridae (CA)-SNaPshot.

*Calliphora lata* (Coquillett, 1898)

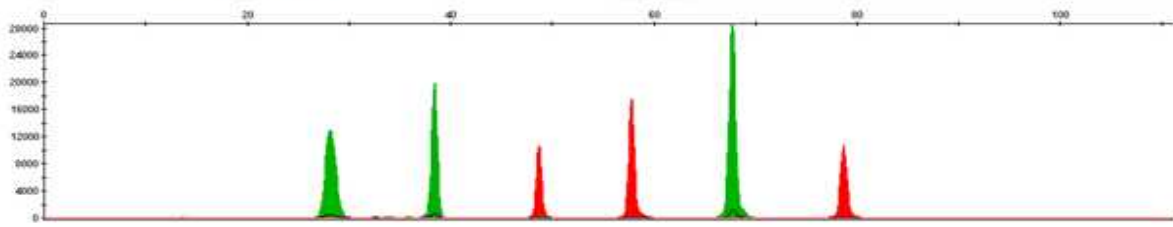

*Phormia regina* (Meigen, 1826)

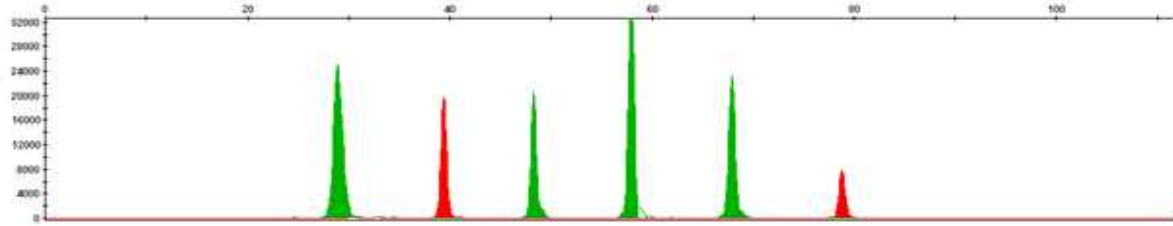

*Calliphora vicina* (Robineau-Desvoidy, 1830)

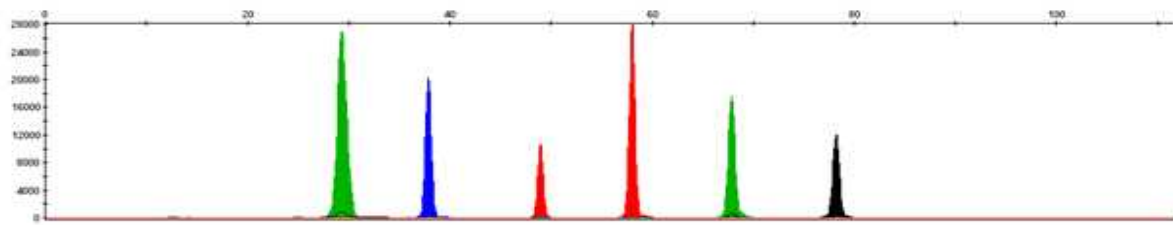

*Lucilia sericata* (Meigen, 1826)

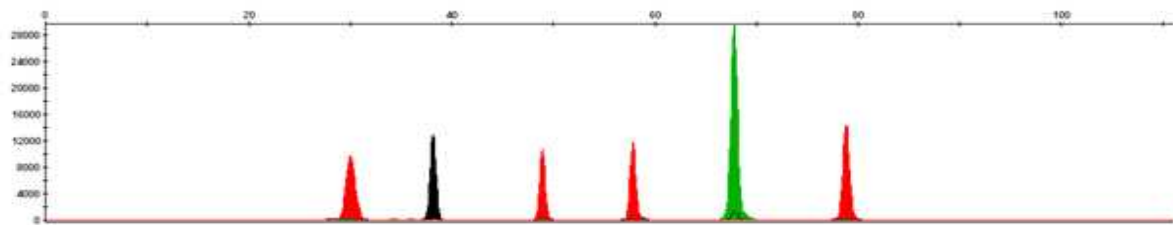

**Supplementary Figure 1-2.** Multiplex system results for Calliphoridae species: using Calliphoridae (CA)-SNaPshot.

*Chrysomya pinguis* (Walker, 1858)

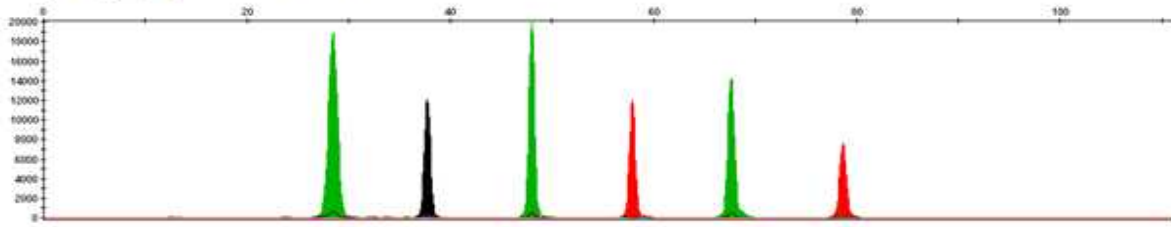

*Triceratopyga calliphoroides* (Rohdendorf, 1931)

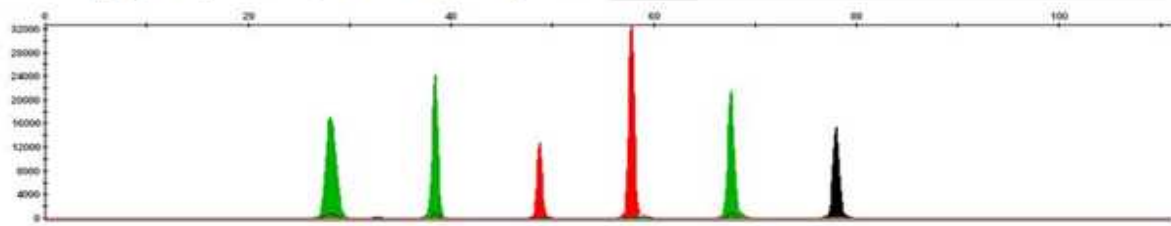

*Aldrichina grahami* (Aldrich, 1930)

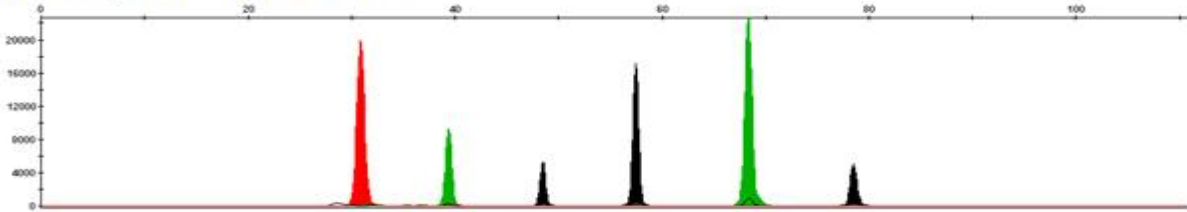

**Supplementary Figure 1-3.** Multiplex system results for Calliphoridae species: using Calliphoridae (CA)-SNaPshot.

*Parasarcophaga albiceps* (Meigen, 1826)

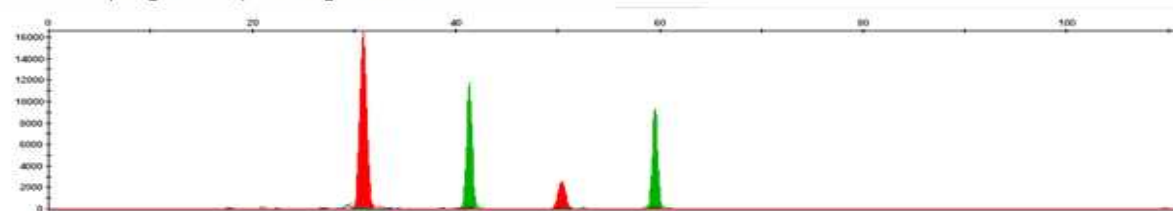

*Sarcophaga similis* (Meade, 1876)

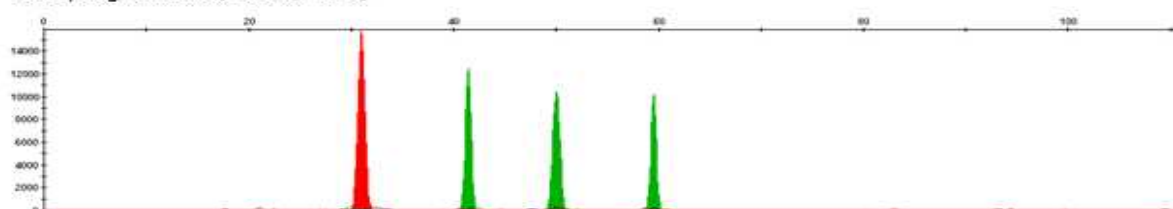

*Sarcophaga haemorrhoidalis* (Fallén, 1817)

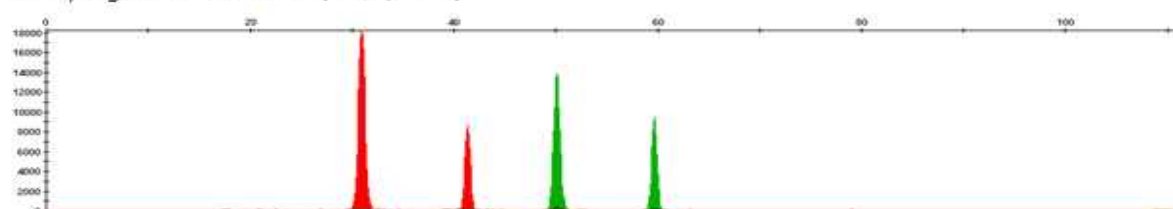

*Sarcophaga peregrina* (Robineau-Desvoidy, 1830)

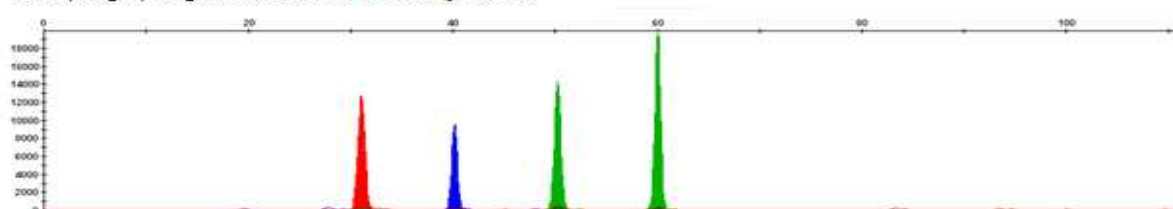

**Supplementary Figure 2-1.** Multiplex system results for Sarcophagidae species: using Sarcophagidae (SA)-SNaPshot.

*Sarcophaga melanura* (Meigen, 1826)

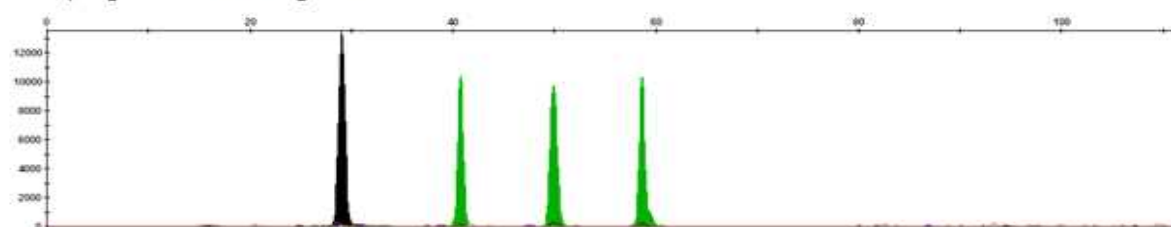

*Sarcophaga crassipalpis* (Macquart, 1839)

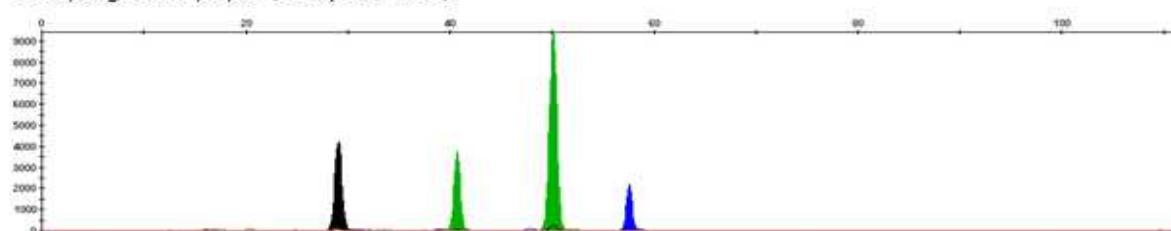

*Sarcophaga dux* (Thomson, 1869)

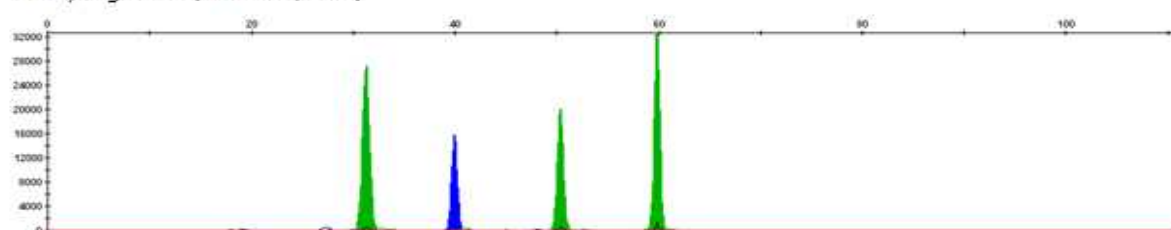

**Supplementary Figure 2-2.** Multiplex system results for Sarcophagidae species: using Sarcophagidae (SA)-SNaPshot.
